# Supplementary material
Source: PubMed Central journal article supplement (PMC2697925)
Supplement: NIHMS111633-supplement-01.pdf [file NIHMS111633-supplement-01.pdf]

# Supplemental Figure 1

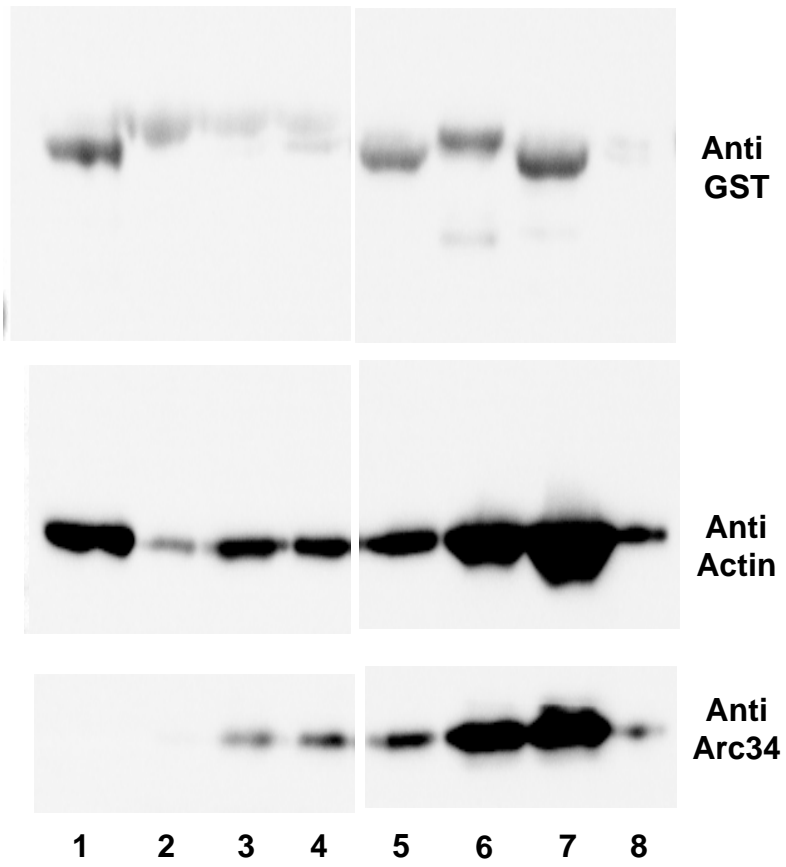

## Supplemental Figure 2

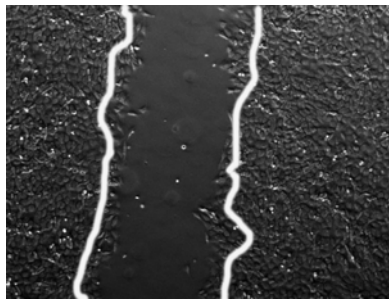

Y253E

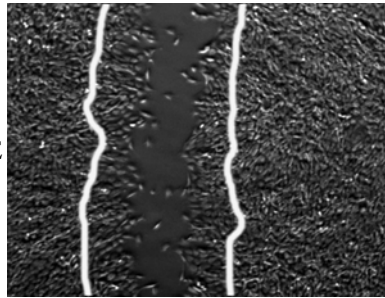

Y253F

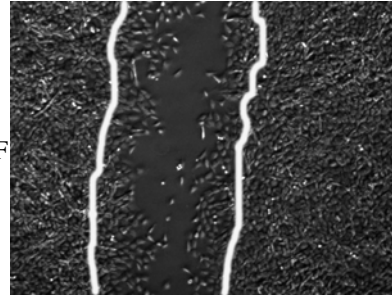

L229P

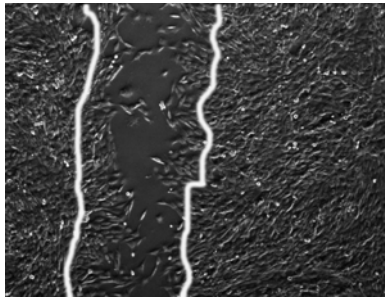

L232P

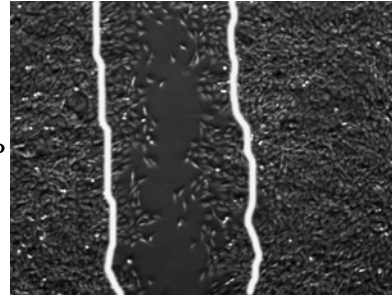

# Supplemental Figure 3

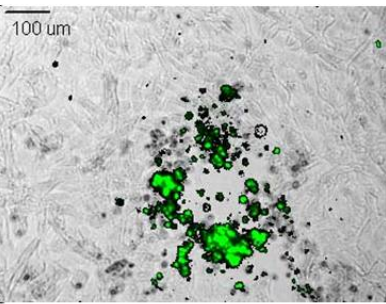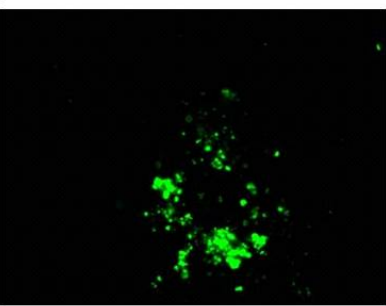

1 image with 10x objective

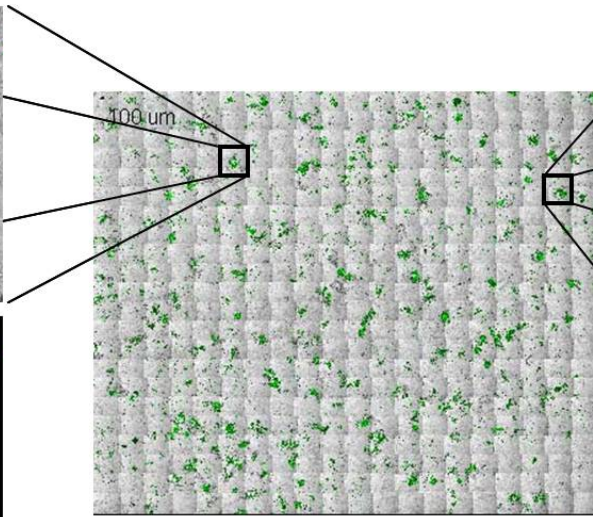

440 10x image montage

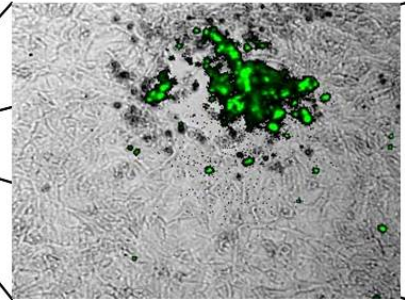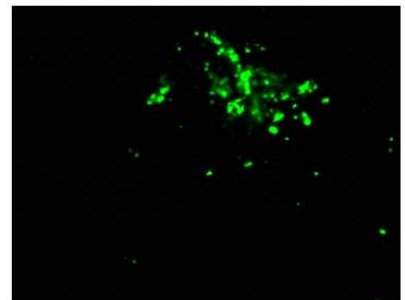

1 image with 10x objective
